# Supplementary material for: Host-derived fecal microRNAs can indicate gut microbiota healthiness and ability to induce inflammation
Source: PubMed Central journal article supplement — Theranostics. 2019 Jun 9;9(15):4542–57. doi: 10.7150/thno.35282 (PMC6599659; doi:10.7150/thno.35282), 2019-06-09

26 **FIGURE LEGENDS**

27

28 **Figure S1: Microbiota and inflammation in WT or IL10<sup>-/-</sup> microbiota-conventionalized mice.**

29 Three-weeks old male and female GF C57BL/6 mice were conventionalized *via* microbiota  
30 transplant from single WT, non-colitic IL10<sup>-/-</sup> or colitic IL10<sup>-/-</sup> female donor mice. **A**, LefSe (LDA  
31 Effect Size) was used to investigate bacterial members that drive the differences in the fecal  
32 microbiota of WT, non-colitic IL10<sup>-/-</sup> and colitic IL10<sup>-/-</sup>. Taxonomic cladogram obtained from  
33 LefSe analysis of fecal 16S rRNA gene sequencing results, highlighting taxa found to be  
34 significantly altered between groups at D42. Blue: taxa enriched in the microbiota of WT  
35 microbiota recipient mice, Green: taxa enriched in the microbiota of non colitic IL10<sup>-/-</sup> microbiota  
36 recipient mice and red: taxa enriched in the microbiota of colitic IL10<sup>-/-</sup> microbiota recipient mice.  
37 The brightness of each dot is proportional to its effect size (LDA score > 2.0). **B**, Body weight of  
38 conventionalized mice from transplant to euthanasia at D49. **C**, Colonic MPO levels at D49. **D**,  
39 Levels of fecal lipocalin-2 (LCN-2) were monitored by ELISA. Data are presented as the means ±  
40 SEM (n=5 per group). Significance was determined by two-way ANOVA followed by Bonferroni  
41 *post-hoc* test. \*\*, p<0.01; \*, p<0.05.

42

43 **Figure S2: Microbiota and inflammatory in WT or colitic IL10<sup>-/-</sup> or TLR5<sup>-/-</sup> microbiota-**  
44 **conventionalized mice.** Three-weeks old male and female GF C57BL/6 mice were

45 conventionalized *via* microbiota transplant from single WT, colitic IL10<sup>-/-</sup> or TLR5<sup>-/-</sup> female donor  
46 mice. **B**, LefSe (LDA Effect Size) was used to investigate bacterial members that drive the  
47 differences in the fecal microbiota of WT, IL10<sup>-/-</sup> and TLR5<sup>-/-</sup>. Taxonomic cladogram obtained  
48 from LefSe analysis of fecal 16S rRNA gene sequencing results, highlighting taxa found to be  
49 significantly between groups at D42. Blue: taxa enriched in the microbiota of WT microbiota  
50 recipient mice, Green: taxa enriched in the microbiota of colitic IL10<sup>-/-</sup> microbiota recipient mice  
51 and red: taxa enriched in the microbiota of colitic TLR5<sup>-/-</sup> microbiota recipient mice. The  
52 brightness of each dot is proportional to its effect size (LDA score > 2.0). **B**, Body weight of  
53 conventionalized mice from transplant to euthanasia at D49. **C**, Colonic MPO levels at day 49.  
54 Data are presented as the means ± SEM (n=5-8 per group). Significance was determined by two-  
55 way ANOVA.

56

**A**

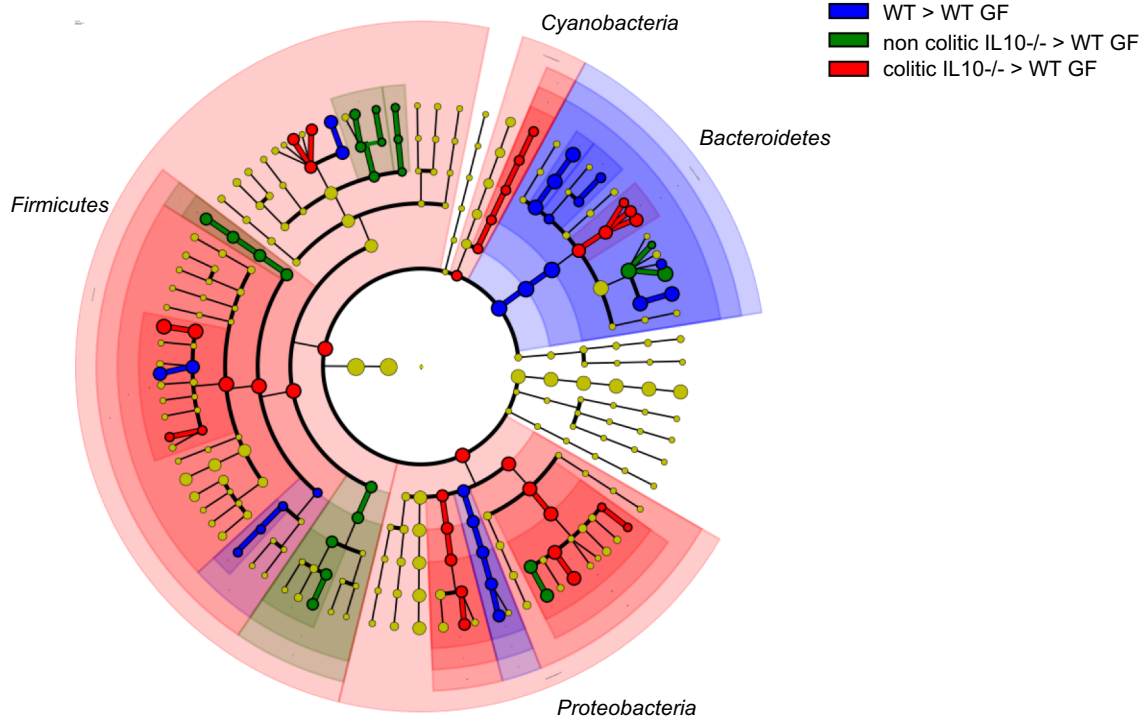

**B**

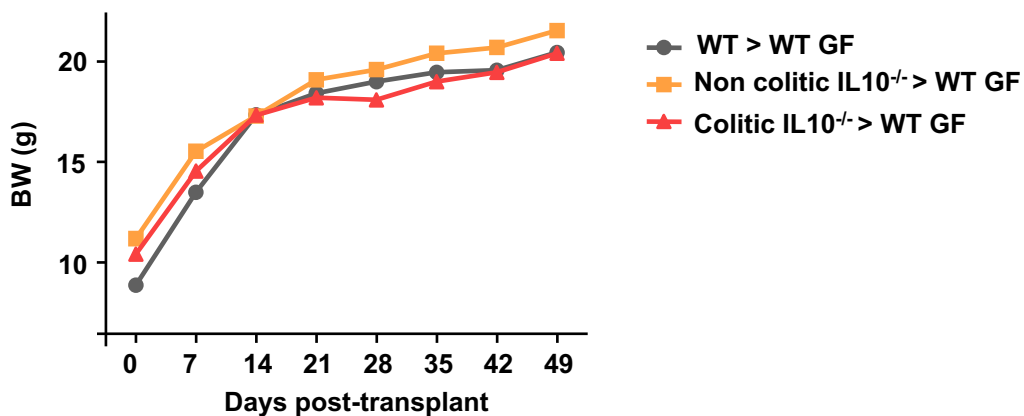

**C**

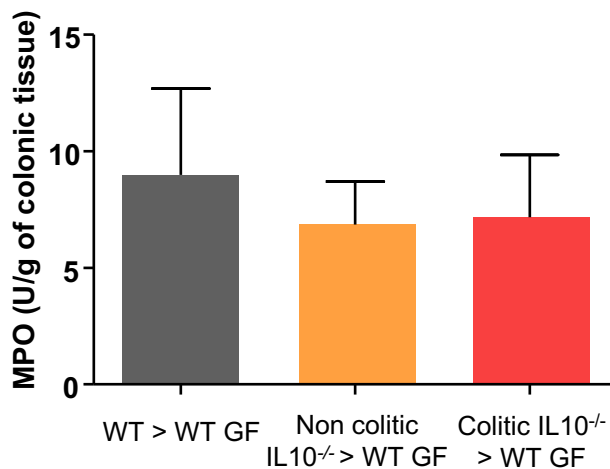

**D**

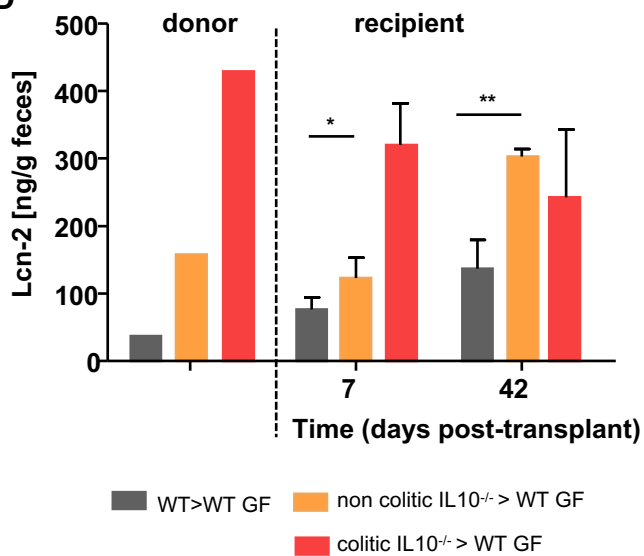

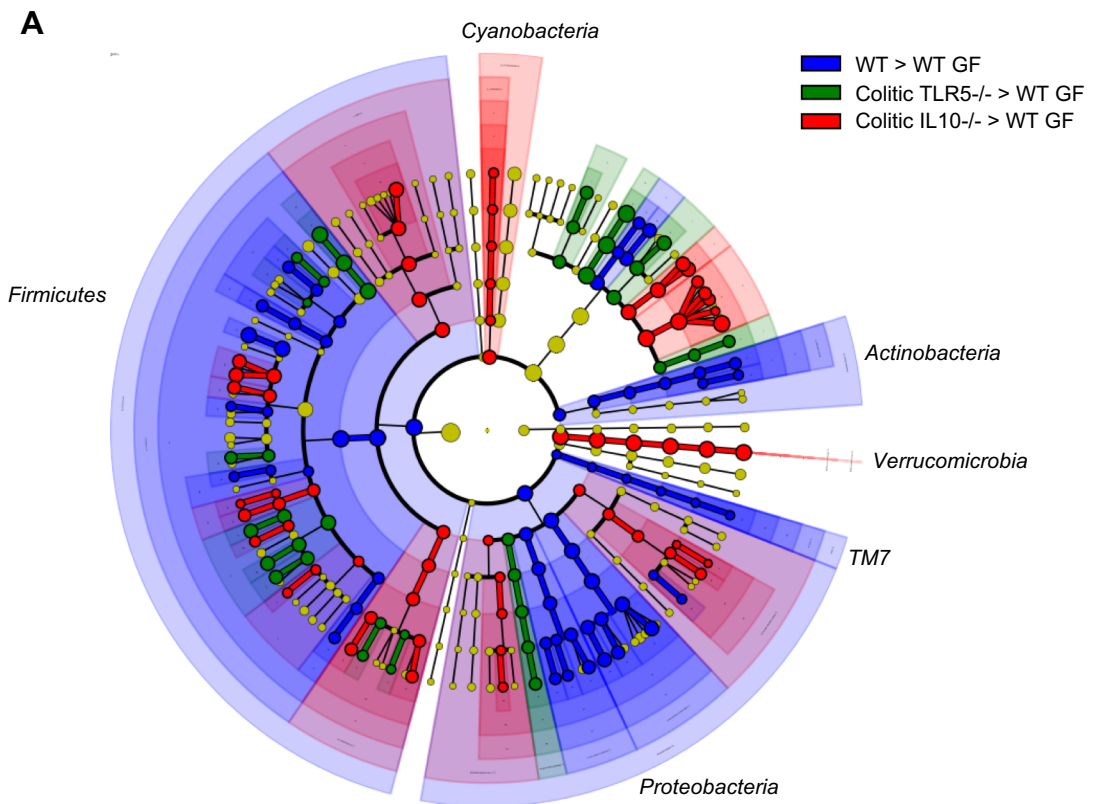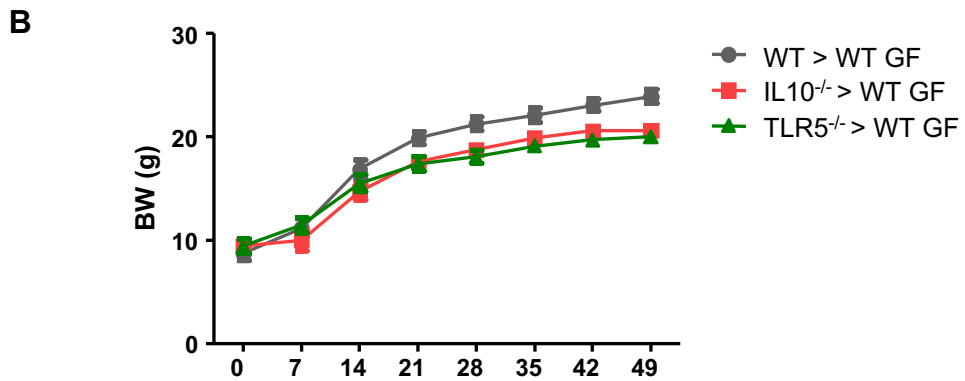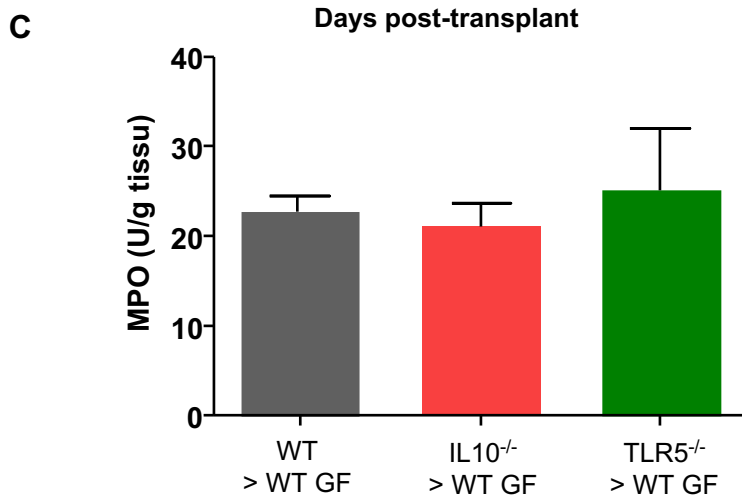

Supplement: thnov09p4542s1.pdf [file thnov09p4542s1.pdf]
